# Supplementary material for: Mucoadhesive gel containing immunotherapeutic nanoparticulate satranidazole for treatment of periodontitis: development and its clinical implications
Source: Royal Society of Chemistry journal article supplement (doi:10.1039/c5ra02350e), 2015-01-01

## Supplementary Material

**Fig. 1 Pictures showing Execution of texture profile analysis of prepared gel SCMC 30NP.**  
**A: Probe entering gel; B: Compression of gel; C: Probe retraction after compression cycle**

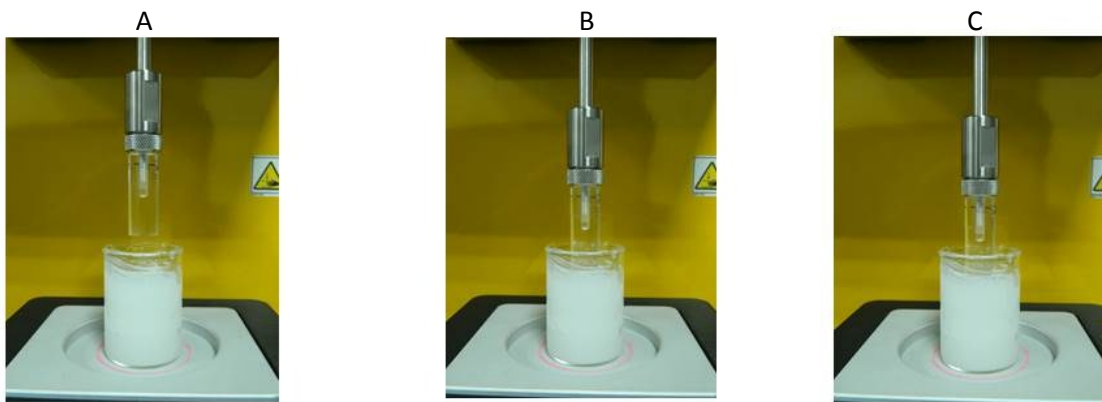

**Fig. 2 Clinical Trial: Pictorial depiction of PNP loaded SZ congaing gel's ability to alleviate symptoms of Periodontitis more efficiently than gel containing SZ only.**

A: Measurement of Pocket Depth in Group A. Notice the Bleeding on Probing before treatment initiation

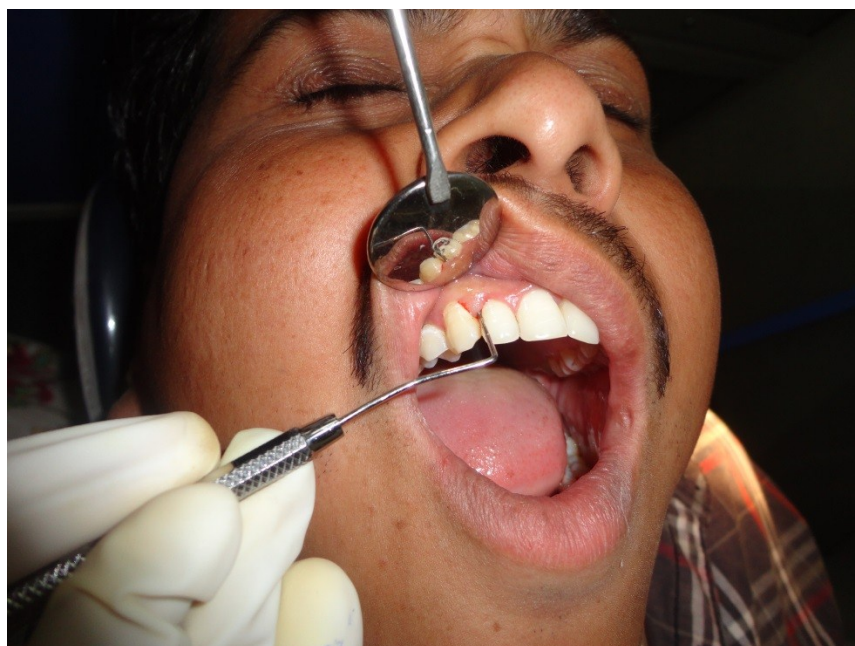

B: Treatment with gel containing SZ on group Group A

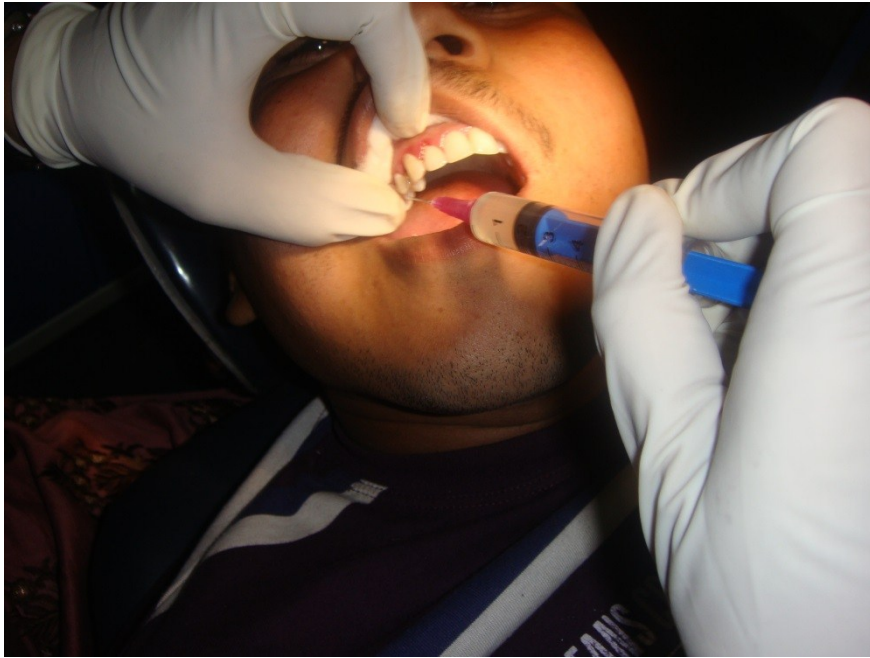

C: Measurement of pocket depth post treatment. No evidence of bleeding on probing

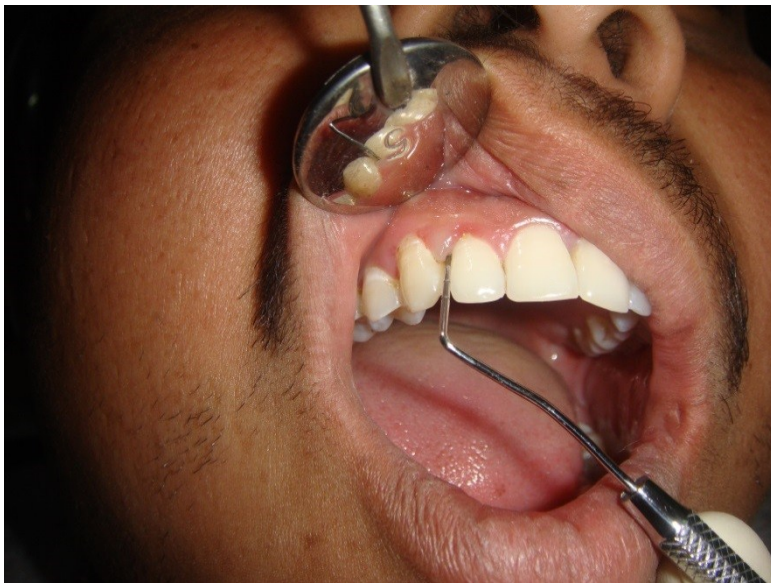

D: Treatment of SZ loaded G-PNP containing gel being administered on the severely inflicted side in group B. Evidence of bleeding is apparent even on contact with the blunt administration syringe.

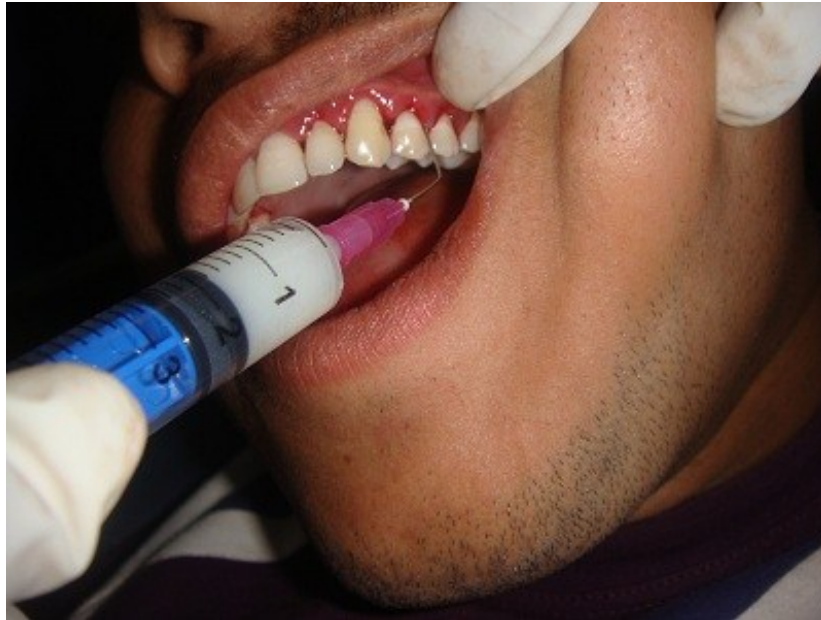

E: Substantial healing with no apparent bleeding even on detailed probing after completion of treatment regime in group B

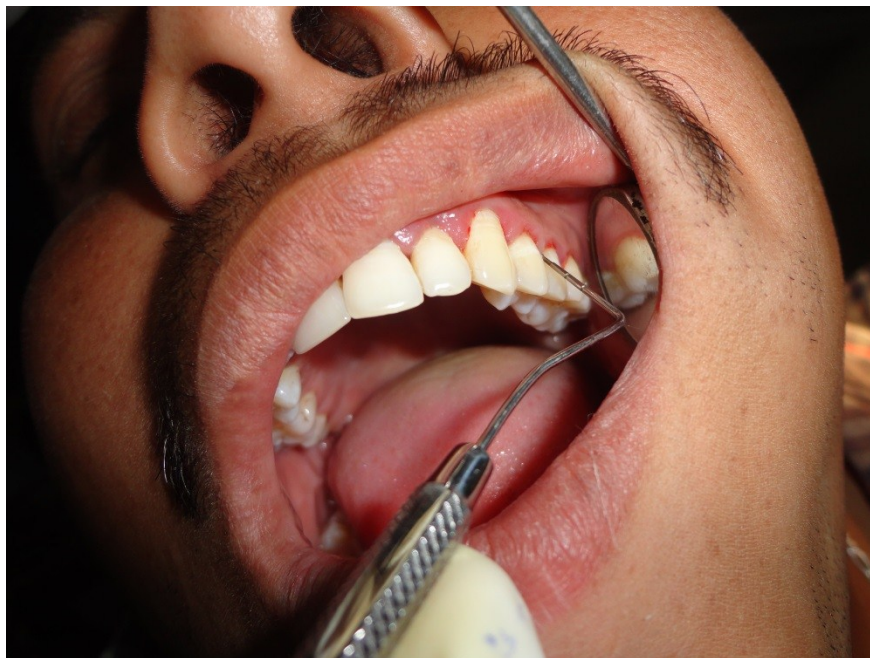

Supplement: c5ra02350e1.pdf [file c5ra02350e1.pdf]
